# Supplementary material for: Bridging the gap between non-targeted stable isotope labeling and metabolic flux analysis
Source: PubMed Central journal article supplement (PMC4842284; doi:10.1186/s40170-016-0150-z), 2016-04-23
Supplement: 40170_2016_150_MOESM1_ESM.pdf [file 40170_2016_150_MOESM1_ESM.pdf]

# Bridging the gap between non-targeted stable isotope labeling and metabolic flux analysis

Supplemental Information

Daniel Weindl, Thekla Cordes, Xiangyi Dong, Andre Wegner, Karsten Hiller

## List of Tables and figures

|           |                                                                                                                      |    |
|-----------|----------------------------------------------------------------------------------------------------------------------|----|
| <b>S1</b> | List compounds detected as isotopically enriched after [1,2- <sup>13</sup> C <sub>2</sub> ]glucose labeling. . . . . | 2  |
| <b>S2</b> | List compounds detected as isotopically enriched after [U- <sup>13</sup> C]glutamine labeling. . . . .               | 11 |
| <b>S3</b> | Metabolites, derivatives and ions shown in Figure 3 (MID variation) . . .                                            | 16 |
| <b>S4</b> | Metabolites, derivatives and ions shown in Figure 4 (MID similarity) . .                                             | 16 |
| <b>S5</b> | Fragmentation of <i>N</i> -acetylaspartic acid 2TMS. . . . .                                                         | 17 |
| <b>S6</b> | siRNA target sequences for gene silencing . . . . .                                                                  | 17 |
| <b>S7</b> | Putative structure and fragmentation of RI 2578 . . . . .                                                            | 18 |

**Table S1:** All compounds which have been detected as isotopically enriched along with their corrected MIDs of the largest detected fragment after [1,2-<sup>13</sup>C<sub>2</sub>]glucose.

| Metabolite       | RI      | Ions (M0)           | M | 21% O <sub>2</sub> | 15% O <sub>2</sub> | 10% O <sub>2</sub> | 5% O <sub>2</sub> | 1% O <sub>2</sub> |
|------------------|---------|---------------------|---|--------------------|--------------------|--------------------|-------------------|-------------------|
| RI 981           | 980.688 | 184 0 0 0 0         | 0 | 0.990              | NA                 | NA                 | NA                | NA                |
|                  |         |                     | 1 | -0.018             | NA                 | NA                 | NA                | NA                |
|                  |         |                     | 2 | 0.030              | NA                 | NA                 | NA                | NA                |
| Lactic acid 2TMS | 1061.92 | 219 0 219 219 219   | 0 | 0.795              | NA                 | 0.794              | 0.798             | 0.802             |
|                  |         |                     | 1 | 0.024              | NA                 | 0.025              | 0.022             | 0.020             |
|                  |         |                     | 2 | 0.194              | NA                 | 0.195              | 0.195             | 0.202             |
| Alanine 2TMS     | 1105.03 | 190 190 190 190 190 | 0 | 0.851              | 0.850              | 0.832              | 0.819             | 0.849             |
|                  |         |                     | 1 | 0.023              | 0.013              | 0.010              | 0.019             | 0.015             |
|                  |         |                     | 2 | 0.144              | 0.148              | 0.150              | 0.179             | 0.143             |
|                  |         |                     | 3 | NA                 | NA                 | 0.011              | NA                | NA                |
| Proline 1TMS     | 1172.79 | 172 0 0 0 0         | 0 | 0.895              | NA                 | NA                 | NA                | NA                |
|                  |         |                     | 1 | 0.030              | NA                 | NA                 | NA                | NA                |
|                  |         |                     | 2 | 0.079              | NA                 | NA                 | NA                | NA                |
| Serine 2TMS      | 1257.33 | 132 132 132 0 0     | 0 | 0.904              | 0.928              | 0.944              | NA                | NA                |
|                  |         |                     | 1 | 0.050              | 0.048              | 0.028              | NA                | NA                |
|                  |         |                     | 2 | 0.043              | 0.022              | 0.041              | NA                | NA                |
| Glycerol 3TMS    | 1277.11 | 218 218 0 0 218     | 0 | 0.936              | 0.931              | NA                 | NA                | 0.916             |
|                  |         |                     | 1 | 0.015              | 0.012              | NA                 | NA                | 0.015             |
|                  |         |                     | 2 | 0.051              | 0.063              | NA                 | NA                | 0.080             |
| Proline 2TMS     | 1296.26 | 0 244 0 0 0         | 0 | NA                 | 0.909              | NA                 | NA                | NA                |
|                  |         |                     | 1 | NA                 | 0.022              | NA                 | NA                | NA                |
|                  |         |                     | 2 | NA                 | 0.070              | NA                 | NA                | NA                |
| Glycine 3TMS     | 1305.68 | 0 0 0 158 0         | 0 | NA                 | NA                 | NA                 | 0.946             | NA                |
|                  |         |                     | 1 | NA                 | NA                 | NA                 | 0.031             | NA                |
|                  |         |                     | 2 | NA                 | NA                 | NA                 | 0.025             | NA                |
|                  |         |                     | 3 | NA                 | NA                 | NA                 | -0.011            | NA                |

Continued on next page

Table S1 – continued from previous page

| Metabolite             | RI      | Ions (M0)         | M | 21% O <sub>2</sub> | 15% O <sub>2</sub> | 10% O <sub>2</sub> | 5% O <sub>2</sub> | 1% O <sub>2</sub> |
|------------------------|---------|-------------------|---|--------------------|--------------------|--------------------|-------------------|-------------------|
| RI 1313                | 1312.95 | 0 173 0 0 0       | 4 | NA                 | NA                 | NA                 | 0.014             | NA                |
|                        |         |                   | 0 | NA                 | 0.803              | NA                 | NA                | NA                |
|                        |         |                   | 1 | NA                 | 0.010              | NA                 | NA                | NA                |
|                        |         |                   | 2 | NA                 | 0.194              | NA                 | NA                | NA                |
| Serine 3TMS            | 1360.03 | 278 278 278 278 0 | 0 | 0.938              | 0.941              | 0.963              | 0.938             | NA                |
|                        |         |                   | 1 | 0.038              | 0.032              | 0.010              | 0.035             | NA                |
|                        |         |                   | 2 | 0.024              | 0.028              | 0.038              | 0.037             | NA                |
| Aspartic acid 2TMS     | 1419.6  | 160 160 0 0 0     | 0 | 0.884              | 0.883              | NA                 | NA                | NA                |
|                        |         |                   | 1 | 0.063              | 0.057              | NA                 | NA                | NA                |
|                        |         |                   | 2 | 0.043              | 0.055              | NA                 | NA                | NA                |
|                        |         |                   | 3 | 0.012              | NA                 | NA                 | NA                | NA                |
| Malic acid 3TMS        | 1487.79 | 335 335 335 335 0 | 0 | 0.882              | 0.889              | 0.894              | 0.997             | NA                |
|                        |         |                   | 1 | 0.026              | 0.034              | 0.047              | -0.021            | NA                |
|                        |         |                   | 2 | 0.078              | 0.068              | 0.060              | 0.013             | NA                |
|                        |         |                   | 3 | 0.004              | 0.000              | 0.011              | 0.017             | NA                |
|                        |         |                   | 4 | 0.017              | 0.015              | NA                 | NA                | NA                |
| Pyroglutamic acid 2TMS | 1516.67 | 0 0 0 214 0       | 0 | NA                 | NA                 | NA                 | 0.940             | NA                |
|                        |         |                   | 1 | NA                 | NA                 | NA                 | 0.006             | NA                |
|                        |         |                   | 2 | NA                 | NA                 | NA                 | 0.063             | NA                |
| Aspartic acid 3TMS     | 1519.17 | 334 334 334 0 0   | 0 | 0.892              | 0.879              | 0.924              | NA                | NA                |
|                        |         |                   | 1 | 0.039              | 0.017              | 0.013              | NA                | NA                |
|                        |         |                   | 2 | 0.062              | 0.083              | 0.059              | NA                | NA                |
|                        |         |                   | 3 | NA                 | 0.023              | NA                 | NA                | NA                |
| RI 1530                | 1529.69 | 216 216 216 0 0   | 0 | 0.789              | 0.787              | 0.793              | NA                | NA                |
|                        |         |                   | 1 | 0.016              | 0.018              | 0.018              | NA                | NA                |
|                        |         |                   | 2 | 0.205              | 0.203              | 0.201              | NA                | NA                |
| Glutamic acid 2TMS     | 1531.47 | 276 276 276 276 0 | 0 | 0.894              | 0.892              | 0.910              | 0.963             | NA                |
|                        |         |                   | 1 | 0.011              | 0.021              | 0.022              | 0.001             | NA                |

Continued on next page

Table S1 – continued from previous page

| Metabolite                        | RI      | Ions (M0)           | M | 21% O <sub>2</sub> | 15% O <sub>2</sub> | 10% O <sub>2</sub> | 5% O <sub>2</sub> | 1% O <sub>2</sub> |
|-----------------------------------|---------|---------------------|---|--------------------|--------------------|--------------------|-------------------|-------------------|
| 2-Hydroxypent-2-endioic acid 3TMS | 1604.44 | 347 347 0 0 0       | 2 | 0.093              | 0.074              | 0.073              | 0.034             | NA                |
|                                   |         |                     | 3 | NA                 | -0.003             | NA                 | NA                | NA                |
|                                   |         |                     | 4 | NA                 | 0.012              | NA                 | NA                | NA                |
|                                   |         |                     | 0 | 0.864              | 0.890              | NA                 | NA                | NA                |
| Glutamic acid 3TMS                | 1617.07 | 348 348 348 0 0     | 1 | 0.037              | 0.010              | NA                 | NA                | NA                |
|                                   |         |                     | 2 | 0.081              | 0.086              | NA                 | NA                | NA                |
|                                   |         |                     | 3 | 0.012              | 0.004              | NA                 | NA                | NA                |
|                                   |         |                     | 4 | 0.013              | 0.019              | NA                 | NA                | NA                |
| RI 1627                           | 1627.07 | 124 124 124 0 0     | 0 | 0.901              | 0.899              | 0.936              | NA                | NA                |
|                                   |         |                     | 1 | 0.022              | 0.023              | 0.010              | NA                | NA                |
|                                   |         |                     | 2 | 0.085              | 0.085              | 0.060              | NA                | NA                |
|                                   |         |                     | 0 | 0.877              | 0.917              | 0.918              | NA                | NA                |
| RI 1634                           | 1633.9  | 0 0 0 0 247         | 1 | 0.035              | 0.031              | 0.025              | NA                | NA                |
|                                   |         |                     | 2 | 0.080              | 0.069              | 0.062              | NA                | NA                |
|                                   |         |                     | 3 | 0.010              | NA                 | NA                 | NA                | NA                |
|                                   |         |                     | 4 | 0.005              | NA                 | NA                 | NA                | NA                |
|                                   |         |                     | 5 | 0.015              | NA                 | NA                 | NA                | NA                |
| N-acetylaspartic acid 2TMS        | 1651.79 | 245 245 245 245 0   | 0 | NA                 | NA                 | NA                 | NA                | 0.486             |
|                                   |         |                     | 1 | NA                 | NA                 | NA                 | NA                | 0.449             |
|                                   |         |                     | 2 | NA                 | NA                 | NA                 | NA                | 0.061             |
| RI 1701                           | 1701.11 | 218 218 0 218 218   | 0 | 0.917              | 0.927              | 0.995              | 1.014             | NA                |
|                                   |         |                     | 1 | 0.040              | 0.021              | -0.034             | 0.006             | NA                |
|                                   |         |                     | 2 | 0.051              | 0.056              | 0.058              | 0.016             | NA                |
| RI 1716                           | 1715.91 | 307 307 307 307 307 | 0 | 0.795              | 0.795              | NA                 | 0.772             | 0.808             |
|                                   |         |                     | 1 | 0.014              | 0.022              | NA                 | 0.017             | 0.014             |
|                                   |         |                     | 2 | 0.193              | 0.190              | NA                 | 0.183             | 0.195             |
|                                   |         |                     | 3 | NA                 | NA                 | NA                 | 0.032             | NA                |
|                                   |         |                     | 0 | 0.790              | 0.830              | 0.833              | 0.795             | 0.844             |

Continued on next page

Table S1 – continued from previous page

| Metabolite                | RI      | Ions (M0)           | M | 21% O <sub>2</sub> | 15% O <sub>2</sub> | 10% O <sub>2</sub> | 5% O <sub>2</sub> | 1% O <sub>2</sub> |
|---------------------------|---------|---------------------|---|--------------------|--------------------|--------------------|-------------------|-------------------|
| Xylitol 5TMS              | 1720.45 | 319 319 319 319 319 | 1 | 0.086              | 0.055              | 0.053              | 0.114             | 0.066             |
|                           |         |                     | 2 | 0.115              | 0.108              | 0.138              | 0.111             | 0.087             |
|                           |         |                     | 3 | NA                 | -0.002             | NA                 | NA                | 0.016             |
|                           |         |                     | 4 | NA                 | 0.014              | NA                 | NA                | NA                |
|                           |         |                     | 0 | 0.646              | 0.674              | 0.654              | 0.631             | 0.614             |
|                           |         |                     | 1 | 0.229              | 0.205              | 0.213              | 0.224             | 0.225             |
|                           |         |                     | 2 | 0.110              | 0.105              | 0.109              | 0.119             | 0.129             |
| RI 1734                   | 1734.44 | 217 217 217 217 0   | 3 | 0.014              | 0.014              | 0.020              | 0.022             | 0.025             |
|                           |         |                     | 4 | NA                 | NA                 | 0.013              | 0.014             | NA                |
|                           |         |                     | 0 | 0.646              | 0.648              | 0.645              | 0.648             | NA                |
|                           |         |                     | 1 | 0.328              | 0.322              | 0.330              | 0.324             | NA                |
| Glycerol-3-phosphate 4TMS | 1757.53 | 357 357 0 357 0     | 2 | 0.032              | 0.035              | 0.030              | 0.031             | NA                |
|                           |         |                     | 0 | 0.816              | 0.828              | NA                 | 0.831             | NA                |
|                           |         |                     | 1 | 0.021              | 0.030              | NA                 | 0.013             | NA                |
|                           |         |                     | 2 | 0.133              | 0.148              | NA                 | 0.140             | NA                |
|                           |         |                     | 3 | 0.017              | NA                 | NA                 | 0.025             | NA                |
| RI 1763                   | 1763.39 | 217 217 0 0 0       | 4 | 0.025              | NA                 | NA                 | NA                | NA                |
|                           |         |                     | 0 | 0.616              | 0.606              | NA                 | NA                | NA                |
|                           |         |                     | 1 | 0.051              | 0.058              | NA                 | NA                | NA                |
|                           |         |                     | 2 | 0.382              | 0.376              | NA                 | NA                | NA                |
| RI 1774                   | 1774.3  | 292 292 0 0 0       | 0 | 0.569              | 0.601              | NA                 | NA                | NA                |
|                           |         |                     | 1 | 0.420              | 0.382              | NA                 | NA                | NA                |
|                           |         |                     | 2 | 0.007              | 0.030              | NA                 | NA                | NA                |
| Fructose 5TMS MP          | 1796.75 | 319 319 319 319 319 | 3 | 0.017              | NA                 | NA                 | NA                | NA                |
|                           |         |                     | 0 | 0.938              | 0.959              | 0.962              | 0.936             | 0.963             |
|                           |         |                     | 1 | 0.039              | 0.021              | 0.017              | 0.027             | 0.002             |
|                           |         |                     | 2 | 0.024              | 0.022              | 0.025              | 0.031             | 0.001             |
|                           |         |                     | 3 | NA                 | NA                 | NA                 | 0.017             | 0.052             |

Continued on next page

Table S1 – continued from previous page

| Metabolite                          | RI      | Ions (M0)           | M | 21% O <sub>2</sub> | 15% O <sub>2</sub> | 10% O <sub>2</sub> | 5% O <sub>2</sub> | 1% O <sub>2</sub> |
|-------------------------------------|---------|---------------------|---|--------------------|--------------------|--------------------|-------------------|-------------------|
| Fructose 5TMS BP                    | 1805.14 | 277 277 0 277 277   | 0 | 0.972              | 0.997              | NA                 | 0.946             | 0.949             |
|                                     |         |                     | 1 | -0.006             | -0.009             | NA                 | 0.028             | 0.000             |
|                                     |         |                     | 2 | -0.034             | -0.018             | NA                 | -0.034            | 0.001             |
|                                     |         |                     | 3 | 0.025              | 0.013              | NA                 | 0.019             | 0.017             |
|                                     |         |                     | 4 | 0.041              | 0.029              | NA                 | 0.042             | 0.016             |
|                                     |         |                     | 5 | NA                 | NA                 | NA                 | 0.011             | 0.024             |
| Citric acid 4TMS                    | 1812.45 | 375 375 375 375 0   | 0 | 0.748              | 0.765              | 0.804              | 0.912             | NA                |
|                                     |         |                     | 1 | 0.039              | 0.040              | 0.022              | 0.010             | NA                |
|                                     |         |                     | 2 | 0.192              | 0.174              | 0.161              | 0.082             | NA                |
|                                     |         |                     | 3 | 0.010              | 0.011              | 0.005              | NA                | NA                |
|                                     |         |                     | 4 | 0.014              | 0.013              | 0.012              | NA                | NA                |
| RI 1823                             | 1823.07 | 329 329 0 0 329     | 0 | 0.453              | 0.485              | NA                 | NA                | 0.546             |
|                                     |         |                     | 1 | 0.051              | 0.029              | NA                 | NA                | -0.002            |
|                                     |         |                     | 2 | 0.393              | 0.400              | NA                 | NA                | 0.409             |
|                                     |         |                     | 3 | 0.031              | 0.014              | NA                 | NA                | 0.029             |
|                                     |         |                     | 4 | 0.070              | 0.068              | NA                 | NA                | 0.030             |
|                                     |         |                     | 5 | 0.013              | NA                 | NA                 | NA                | NA                |
| RI 1834                             | 1833.51 | 217 217 0 0 0       | 0 | 0.921              | 0.930              | NA                 | NA                | NA                |
|                                     |         |                     | 1 | 0.038              | 0.017              | NA                 | NA                | NA                |
|                                     |         |                     | 2 | 0.036              | 0.050              | NA                 | NA                | NA                |
|                                     |         |                     | 3 | -0.001             | NA                 | NA                 | NA                | NA                |
|                                     |         |                     | 4 | 0.011              | NA                 | NA                 | NA                | NA                |
| Mannose [-H <sub>2</sub> O] 4TMS MP | 1838.31 | 217 217 0 0 0       | 0 | 0.559              | 0.564              | NA                 | NA                | NA                |
|                                     |         |                     | 1 | 0.418              | 0.421              | NA                 | NA                | NA                |
|                                     |         |                     | 2 | 0.023              | 0.022              | NA                 | NA                | NA                |
| RI 1883                             | 1882.7  | 103 0 0 0 0         | 0 | 0.934              | NA                 | NA                 | NA                | NA                |
|                                     |         |                     | 1 | 0.064              | NA                 | NA                 | NA                | NA                |
| Glucose 5TMS BP                     | 1887.02 | 435 435 435 435 435 | 0 | 0.553              | 0.552              | 0.560              | 0.558             | 0.558             |

Continued on next page

Table S1 – *continued from previous page*

| Metabolite         | RI      | Ions (M0)           | M | 21% O <sub>2</sub> | 15% O <sub>2</sub> | 10% O <sub>2</sub> | 5% O <sub>2</sub> | 1% O <sub>2</sub> |
|--------------------|---------|---------------------|---|--------------------|--------------------|--------------------|-------------------|-------------------|
|                    |         |                     | 1 | 0.002              | 0.003              | -0.005             | 0.002             | 0.003             |
|                    |         |                     | 2 | 0.538              | 0.541              | 0.533              | 0.530             | 0.525             |
| RI 1897            | 1896.72 | 0 0 0 0 204         | 0 | NA                 | NA                 | NA                 | NA                | 0.662             |
|                    |         |                     | 1 | NA                 | NA                 | NA                 | NA                | 0.374             |
| RI 1897            | 1896.9  | 204 0 0 204 0       | 0 | 0.629              | NA                 | NA                 | 0.647             | NA                |
|                    |         |                     | 1 | 0.351              | NA                 | NA                 | 0.334             | NA                |
|                    |         |                     | 2 | -0.009             | NA                 | NA                 | -0.003            | NA                |
|                    |         |                     | 3 | 0.018              | NA                 | NA                 | 0.012             | NA                |
|                    |         |                     | 4 | 0.000              | NA                 | NA                 | -0.007            | NA                |
|                    |         |                     | 5 | 0.013              | NA                 | NA                 | 0.019             | NA                |
| Glucose 1MEOX 5TMS | 1908.55 | 217 217 160 0 0     | 0 | 0.865              | 0.955              | 0.550              | NA                | NA                |
|                    |         |                     | 1 | 0.130              | 0.078              | 0.045              | NA                | NA                |
|                    |         |                     | 2 | -0.004             | NA                 | 0.453              | NA                | NA                |
|                    |         |                     | 3 | 0.024              | NA                 | NA                 | NA                | NA                |
| Lysine 4TMS        | 1916.85 | 0 0 0 0 186         | 0 | NA                 | NA                 | NA                 | NA                | 0.949             |
|                    |         |                     | 1 | NA                 | NA                 | NA                 | NA                | -0.005            |
|                    |         |                     | 2 | NA                 | NA                 | NA                 | NA                | 0.013             |
|                    |         |                     | 3 | NA                 | NA                 | NA                 | NA                | 0.015             |
|                    |         |                     | 4 | NA                 | NA                 | NA                 | NA                | 0.030             |
|                    |         |                     | 5 | NA                 | NA                 | NA                 | NA                | 0.030             |
| RI 1922            | 1922.17 | 319 319 0 319 0     | 0 | 0.912              | 0.936              | NA                 | 0.927             | NA                |
|                    |         |                     | 1 | 0.027              | 0.014              | NA                 | 0.014             | NA                |
|                    |         |                     | 2 | 0.058              | 0.048              | NA                 | 0.034             | NA                |
|                    |         |                     | 3 | NA                 | -0.010             | NA                 | 0.022             | NA                |
|                    |         |                     | 4 | NA                 | 0.017              | NA                 | NA                | NA                |
| RI 1929            | 1929.02 | 345 345 345 345 345 | 0 | 0.581              | 0.614              | 0.597              | 0.596             | 0.616             |
|                    |         |                     | 1 | 0.012              | 0.010              | 0.009              | 0.014             | 0.005             |
|                    |         |                     | 2 | 0.470              | 0.434              | 0.452              | 0.451             | 0.447             |

Continued on next page

Table S1 – continued from previous page

| Metabolite             | RI      | Ions (M0)           | M | 21% O <sub>2</sub> | 15% O <sub>2</sub> | 10% O <sub>2</sub> | 5% O <sub>2</sub> | 1% O <sub>2</sub> |
|------------------------|---------|---------------------|---|--------------------|--------------------|--------------------|-------------------|-------------------|
| RI 1955                | 1954.81 | 333 333 0 0 0       | 0 | 0.926              | 0.969              | NA                 | NA                | NA                |
|                        |         |                     | 1 | 0.014              | 0.004              | NA                 | NA                | NA                |
|                        |         |                     | 2 | 0.030              | 0.085              | NA                 | NA                | NA                |
|                        |         |                     | 3 | 0.037              | -0.069             | NA                 | NA                | NA                |
|                        |         |                     | 4 | NA                 | 0.011              | NA                 | NA                | NA                |
| Glucose 5TMS MP        | 1974.11 | 435 435 435 435 435 | 0 | 0.565              | 0.567              | 0.554              | 0.563             | 0.574             |
|                        |         |                     | 1 | -0.001             | 0.000              | -0.001             | -0.001            | -0.009            |
|                        |         |                     | 2 | 0.525              | 0.516              | 0.533              | 0.523             | 0.530             |
| RI 1986                | 1986.25 | 217 217 217 217 217 | 0 | 0.857              | 0.872              | 0.863              | 0.877             | 0.825             |
|                        |         |                     | 1 | 0.136              | 0.126              | 0.123              | 0.111             | 0.148             |
|                        |         |                     | 2 | NA                 | NA                 | NA                 | NA                | 0.010             |
| RI 1990                | 1989.96 | 333 0 0 0 292       | 0 | 0.550              | NA                 | NA                 | NA                | 0.589             |
|                        |         |                     | 1 | 0.013              | NA                 | NA                 | NA                | 0.003             |
|                        |         |                     | 2 | 0.437              | NA                 | NA                 | NA                | 0.460             |
|                        |         |                     | 3 | 0.003              | NA                 | NA                 | NA                | NA                |
| RI 2012                | 2012.02 | 243 243 243 243 0   | 0 | 0.537              | 0.531              | 0.541              | 0.537             | NA                |
|                        |         |                     | 1 | 0.282              | 0.293              | 0.287              | 0.302             | NA                |
|                        |         |                     | 2 | 0.112              | 0.106              | 0.111              | 0.112             | NA                |
|                        |         |                     | 3 | 0.056              | 0.046              | 0.055              | 0.061             | NA                |
|                        |         |                     | 4 | 0.024              | 0.021              | 0.017              | NA                | NA                |
| RI 2023                | 2023.22 | 0 346 0 0 0         | 0 | NA                 | 0.895              | NA                 | NA                | NA                |
|                        |         |                     | 1 | NA                 | 0.021              | NA                 | NA                | NA                |
|                        |         |                     | 2 | NA                 | 0.073              | NA                 | NA                | NA                |
|                        |         |                     | 3 | NA                 | 0.022              | NA                 | NA                | NA                |
| Hexadecanoic acid 1TMS | 2042.73 | 313 313 0 0 0       | 0 | 0.762              | 0.779              | NA                 | NA                | NA                |
|                        |         |                     | 1 | 0.021              | 0.008              | NA                 | NA                | NA                |

Continued on next page



Table S1 – *continued from previous page*

| Metabolite | RI      | Ions (M0)           | M     | 21% O <sub>2</sub> | 15% O <sub>2</sub> | 10% O <sub>2</sub> | 5% O <sub>2</sub> | 1% O <sub>2</sub> |
|------------|---------|---------------------|-------|--------------------|--------------------|--------------------|-------------------|-------------------|
| RI 2070    | 2069.62 | 103 103 0 0 0       | 2     | 0.094              | 0.102              | NA                 | NA                | NA                |
|            |         |                     | 3     | 0.031              | 0.020              | NA                 | NA                | NA                |
|            |         |                     | 4     | 0.083              | 0.070              | NA                 | NA                | NA                |
|            |         |                     | 5     | -0.010             | 0.003              | NA                 | NA                | NA                |
|            |         |                     | 6     | 0.024              | 0.024              | NA                 | NA                | NA                |
|            |         |                     | 0     | 0.889              | 0.870              | NA                 | NA                | NA                |
| RI 2075    | 2075.49 | 0 103 103 0 0       | 1     | 0.120              | 0.115              | NA                 | NA                | NA                |
|            |         |                     | 2     | -0.023             | 0.004              | NA                 | NA                | NA                |
|            |         |                     | 3     | 0.015              | 0.010              | NA                 | NA                | NA                |
|            |         |                     | 0     | NA                 | 0.889              | 0.870              | NA                | NA                |
| RI 2158    | 2157.62 | 282 0 0 0 0         | 1     | NA                 | 0.124              | 0.101              | NA                | NA                |
|            |         |                     | 2     | NA                 | -0.024             | 0.008              | NA                | NA                |
|            |         |                     | 3     | NA                 | 0.011              | 0.022              | NA                | NA                |
| RI 2163    | 2163.02 | 0 217 0 217 0       | 0     | 0.920              | NA                 | NA                 | NA                | NA                |
|            |         |                     | 1     | 0.032              | NA                 | NA                 | NA                | NA                |
|            |         |                     | 2     | 0.049              | NA                 | NA                 | NA                | NA                |
|            |         |                     | 0     | NA                 | 0.938              | NA                 | 0.891             | NA                |
| RI 2249    | 2248.81 | 0 217 217 0 0       | 1     | NA                 | 0.032              | NA                 | 0.039             | NA                |
|            |         |                     | 2     | NA                 | 0.029              | NA                 | 0.062             | NA                |
|            |         |                     | 3     | NA                 | 0.000              | NA                 | 0.028             | NA                |
|            |         |                     | 4     | NA                 | 0.012              | NA                 | NA                | NA                |
| RI 2268    | 2268.1  | 0 232 232 0 232     | 0     | NA                 | 0.902              | 0.926              | NA                | NA                |
|            |         |                     | 1     | NA                 | 0.054              | 0.033              | NA                | NA                |
|            |         |                     | 2     | NA                 | 0.042              | 0.051              | NA                | NA                |
| RI 2473    | 2472.66 | 287 287 287 287 287 | 0     | NA                 | 0.525              | 0.515              | NA                | 0.528             |
|            |         |                     | 1     | NA                 | 0.472              | 0.478              | NA                | 0.479             |
|            |         |                     | 2     | NA                 | NA                 | 0.011              | NA                | NA                |
| 0          | 0.500   | 0.534               | 0.541 | 0.515              | 0.550              |                    |                   |                   |

Continued on next page

Table S1 – *continued from previous page*

| Metabolite | RI      | Ions (M0)           | M | 21% O <sub>2</sub> | 15% O <sub>2</sub> | 10% O <sub>2</sub> | 5% O <sub>2</sub> | 1% O <sub>2</sub> |
|------------|---------|---------------------|---|--------------------|--------------------|--------------------|-------------------|-------------------|
| RI 2578    | 2578.32 | 363 363 363 363 0   | 1 | 0.470              | 0.445              | 0.523              | 0.458             | 0.470             |
|            |         |                     | 2 | 0.032              | 0.019              | NA                 | 0.028             | NA                |
|            |         |                     | 3 | NA                 | NA                 | NA                 | 0.017             | NA                |
|            |         |                     | 0 | 0.821              | 0.832              | 0.869              | 0.939             | NA                |
|            |         |                     | 1 | 0.052              | 0.033              | 0.003              | 0.006             | NA                |
|            |         |                     | 2 | 0.113              | 0.131              | 0.113              | 0.067             | NA                |
| RI 2865    | 2864.58 | 315 315 315 315 315 | 3 | 0.004              | -0.002             | -0.005             | NA                | NA                |
|            |         |                     | 4 | 0.007              | 0.011              | 0.004              | NA                | NA                |
|            |         |                     | 5 | 0.016              | NA                 | 0.038              | NA                | NA                |
|            |         |                     | 0 | 0.995              | 0.991              | 1.007              | 1.007             | 0.946             |
|            |         |                     | 1 | NA                 | NA                 | NA                 | NA                | -0.007            |
|            |         |                     | 2 | NA                 | NA                 | NA                 | NA                | 0.057             |
| RI 3037    | 3037.3  | 258 258 258 258 258 | 3 | NA                 | NA                 | NA                 | NA                | -0.007            |
|            |         |                     | 4 | NA                 | NA                 | NA                 | NA                | 0.012             |
|            |         |                     | 0 | 0.529              | 0.548              | 0.534              | 0.571             | 0.599             |
|            |         |                     | 1 | 0.299              | 0.274              | 0.270              | 0.251             | 0.185             |
|            |         |                     | 2 | 0.113              | 0.123              | 0.122              | 0.125             | 0.114             |
|            |         |                     | 3 | 0.044              | 0.046              | 0.057              | 0.054             | 0.046             |
| AMP 5TMS   | 3050.94 | 169 169 169 0 169   | 4 | 0.019              | 0.020              | 0.018              | 0.007             | 0.026             |
|            |         |                     | 5 | NA                 | NA                 | 0.012              | 0.014             | 0.012             |
|            |         |                     | 6 | NA                 | NA                 | NA                 | NA                | 0.035             |
|            |         |                     | 0 | 0.517              | 0.537              | 0.533              | NA                | 0.633             |
|            |         |                     | 1 | 0.306              | 0.278              | 0.279              | NA                | 0.198             |
|            |         |                     | 2 | 0.122              | 0.131              | 0.126              | NA                | 0.094             |
|            |         |                     | 3 | 0.045              | 0.046              | 0.045              | NA                | 0.060             |
|            |         |                     | 4 | NA                 | 0.011              | 0.020              | NA                | 0.017             |

**Table S2:** All compounds which have been detected as isotopically enriched along with their corrected MIDs of the largest detected fragment after [U-<sup>13</sup>C]glutamine.

| Metabolite         | RI      | Ions (M0)           | M | 21% O <sub>2</sub> | 15% O <sub>2</sub> | 10% O <sub>2</sub> | 5% O <sub>2</sub> | 1% O <sub>2</sub> |
|--------------------|---------|---------------------|---|--------------------|--------------------|--------------------|-------------------|-------------------|
| RI 965             | 964.562 | 0 0 131 131 0       | 0 | NA                 | NA                 | 0.950              | 0.940             | NA                |
|                    |         |                     | 1 | NA                 | NA                 | 0.007              | -0.001            | NA                |
|                    |         |                     | 2 | NA                 | NA                 | 0.004              | 0.003             | NA                |
|                    |         |                     | 3 | NA                 | NA                 | 0.003              | 0.008             | NA                |
|                    |         |                     | 4 | NA                 | NA                 | 0.021              | 0.040             | NA                |
|                    |         |                     | 5 | NA                 | NA                 | -0.001             | -0.005            | NA                |
|                    |         |                     | 6 | NA                 | NA                 | 0.021              | -0.001            | NA                |
| Proline 1TMS       | 1173.02 | 0 103 103 103 0     | 0 | NA                 | 0.665              | 0.654              | 0.663             | NA                |
|                    |         |                     | 1 | NA                 | 0.313              | 0.350              | 0.322             | NA                |
|                    |         |                     | 2 | NA                 | 0.013              | NA                 | 0.016             | NA                |
|                    |         |                     | 3 | NA                 | 0.010              | NA                 | NA                | NA                |
| Proline 2TMS       | 1296.65 | 216 216 216 216 216 | 0 | 0.731              | 0.736              | 0.721              | 0.718             | 0.774             |
|                    |         |                     | 1 | 0.034              | 0.035              | 0.016              | 0.020             | 0.006             |
|                    |         |                     | 2 | -0.007             | -0.007             | -0.003             | -0.004            | -0.001            |
|                    |         |                     | 3 | 0.001              | 0.001              | 0.001              | 0.001             | 0.000             |
|                    |         |                     | 4 | 0.234              | 0.223              | 0.253              | 0.265             | 0.219             |
|                    |         |                     | 5 | -0.012             | -0.003             | -0.006             | -0.014            | -0.012            |
| Aspartic acid 2TMS | 1419.9  | 160 160 160 0 0     | 0 | 0.629              | 0.644              | 0.621              | NA                | NA                |
|                    |         |                     | 1 | 0.085              | 0.081              | 0.063              | NA                | NA                |
|                    |         |                     | 2 | 0.081              | 0.086              | 0.098              | NA                | NA                |
|                    |         |                     | 3 | 0.210              | 0.189              | 0.221              | NA                | NA                |
| Malic acid 3TMS    | 1487.87 | 245 245 245 245 245 | 0 | 0.643              | 0.656              | 0.649              | 0.668             | 0.652             |
|                    |         |                     | 1 | 0.042              | 0.042              | 0.021              | 0.004             | 0.008             |
|                    |         |                     | 2 | 0.091              | 0.086              | 0.071              | 0.038             | 0.023             |

Continued on next page

Table S2 – *continued from previous page*

| Metabolite                        | RI      | Ions (M0)           | M | 21% O <sub>2</sub> | 15% O <sub>2</sub> | 10% O <sub>2</sub> | 5% O <sub>2</sub> | 1% O <sub>2</sub> |
|-----------------------------------|---------|---------------------|---|--------------------|--------------------|--------------------|-------------------|-------------------|
| Pyroglutamic acid 2TMS            | 1516.53 | 258 258 258 258 258 | 3 | 0.059              | 0.064              | 0.103              | 0.186             | 0.290             |
|                                   |         |                     | 4 | 0.191              | 0.175              | 0.179              | 0.120             | 0.030             |
|                                   |         |                     | 0 | 0.568              | 0.578              | 0.565              | 0.579             | 0.574             |
|                                   |         |                     | 1 | 0.012              | 0.011              | 0.005              | 0.001             | 0.000             |
|                                   |         |                     | 2 | 0.015              | 0.013              | 0.015              | 0.010             | 0.003             |
|                                   |         |                     | 3 | 0.040              | 0.035              | 0.033              | 0.023             | 0.005             |
| Aspartic acid 3TMS                | 1519.22 | 306 306 306 306 306 | 4 | 0.013              | 0.013              | 0.013              | 0.014             | 0.016             |
|                                   |         |                     | 5 | 0.384              | 0.380              | 0.403              | 0.408             | 0.437             |
|                                   |         |                     | 0 | 0.621              | 0.635              | 0.615              | 0.648             | 0.633             |
|                                   |         |                     | 1 | 0.074              | 0.069              | 0.058              | 0.022             | 0.019             |
|                                   |         |                     | 2 | 0.072              | 0.075              | 0.090              | 0.121             | 0.156             |
|                                   |         |                     | 3 | 0.234              | 0.223              | 0.235              | 0.209             | 0.178             |
| Glutamic acid 2TMS                | 1531.48 | 276 276 276 276 276 | 4 | NA                 | NA                 | NA                 | NA                | 0.010             |
|                                   |         |                     | 5 | NA                 | NA                 | NA                 | NA                | 0.010             |
|                                   |         |                     | 0 | 0.595              | 0.594              | 0.574              | 0.583             | 0.584             |
|                                   |         |                     | 1 | 0.028              | 0.041              | 0.030              | 0.009             | 0.007             |
|                                   |         |                     | 2 | 0.019              | 0.041              | 0.030              | 0.031             | 0.022             |
|                                   |         |                     | 3 | 0.097              | 0.084              | 0.077              | 0.048             | 0.015             |
| 2-Hydroxypent-2-endioic acid 3TMS | 1604.4  | 0 347 0 0 0         | 4 | 0.018              | 0.013              | 0.016              | 0.019             | 0.022             |
|                                   |         |                     | 5 | 0.264              | 0.251              | 0.296              | 0.337             | 0.374             |
|                                   |         |                     | 6 | NA                 | NA                 | NA                 | NA                | 0.010             |
|                                   |         |                     | 0 | NA                 | 0.592              | NA                 | NA                | NA                |
|                                   |         |                     | 1 | NA                 | 0.033              | NA                 | NA                | NA                |
|                                   |         |                     | 2 | NA                 | 0.035              | NA                 | NA                | NA                |
| Glutamic acid 3TMS                | 1616.94 | 348 348 348 348 348 | 3 | NA                 | 0.087              | NA                 | NA                | NA                |
|                                   |         |                     | 4 | NA                 | 0.029              | NA                 | NA                | NA                |
|                                   |         |                     | 5 | NA                 | 0.261              | NA                 | NA                | NA                |
|                                   |         |                     | 0 | 0.582              | 0.599              | 0.580              | 0.596             | 0.596             |
|                                   |         |                     |   |                    |                    |                    |                   |                   |

Continued on next page

Table S2 – continued from previous page

| Metabolite                 | RI      | Ions (M0)           | M | 21% O <sub>2</sub> | 15% O <sub>2</sub> | 10% O <sub>2</sub> | 5% O <sub>2</sub> | 1% O <sub>2</sub> |
|----------------------------|---------|---------------------|---|--------------------|--------------------|--------------------|-------------------|-------------------|
|                            |         |                     | 1 | 0.032              | 0.030              | 0.018              | 0.001             | 0.005             |
|                            |         |                     | 2 | 0.035              | 0.037              | 0.032              | 0.022             | 0.006             |
|                            |         |                     | 3 | 0.093              | 0.092              | 0.078              | 0.044             | 0.008             |
|                            |         |                     | 4 | 0.011              | 0.009              | 0.011              | 0.013             | 0.016             |
|                            |         |                     | 5 | 0.283              | 0.270              | 0.324              | 0.373             | 0.425             |
| RI 1627                    | 1627.07 | 172 172 172 0 0     | 0 | 0.619              | 0.597              | 0.599              | NA                | NA                |
|                            |         |                     | 1 | 0.059              | 0.053              | 0.048              | NA                | NA                |
|                            |         |                     | 2 | 0.350              | 0.347              | 0.355              | NA                | NA                |
|                            |         |                     | 3 | NA                 | -0.017             | NA                 | NA                | NA                |
|                            |         |                     | 4 | NA                 | 0.020              | NA                 | NA                | NA                |
|                            |         |                     | 5 | 0.635              | 0.667              | 0.638              | 0.700             | 0.666             |
| N-acetylaspartic acid 2TMS | 1651.78 | 245 245 245 245 245 | 0 | 0.038              | 0.019              | 0.010              | 0.002             | 0.009             |
|                            |         |                     | 1 | 0.066              | 0.073              | 0.060              | 0.030             | 0.023             |
|                            |         |                     | 2 | 0.083              | 0.079              | 0.107              | 0.154             | 0.266             |
|                            |         |                     | 3 | 0.183              | 0.170              | 0.183              | 0.122             | 0.041             |
|                            |         |                     | 4 | NA                 | NA                 | NA                 | 0.014             | NA                |
|                            |         |                     | 5 | 0.949              | NA                 | NA                 | NA                | 1.010             |
| Xylitol 5TMS               | 1718.27 | 319 0 0 0 319       | 0 | 0.052              | NA                 | NA                 | NA                | NA                |
|                            |         |                     | 1 | 0.519              | 0.530              | 0.514              | 0.499             | 0.513             |
|                            |         |                     | 1 | 0.012              | 0.006              | 0.008              | 0.023             | 0.013             |
|                            |         |                     | 2 | 0.044              | 0.052              | 0.052              | 0.067             | 0.056             |
|                            |         |                     | 3 | 0.004              | -0.011             | 0.004              | 0.011             | 0.014             |
|                            |         |                     | 4 | 0.019              | 0.010              | 0.021              | 0.013             | 0.023             |
|                            |         |                     | 5 | 0.453              | 0.460              | 0.457              | 0.438             | 0.438             |
|                            |         |                     | 6 | NA                 | 0.018              | NA                 | NA                | NA                |
|                            |         |                     | 0 | 0.616              | 0.645              | 0.623              | 0.665             | NA                |
|                            |         |                     | 1 | 0.048              | 0.043              | 0.022              | 0.024             | NA                |
|                            |         |                     | 2 | 0.091              | 0.081              | 0.068              | 0.028             | NA                |
| Citric acid 4TMS           | 1812.45 | 375 375 375 375 0   | 0 | 0.616              | 0.645              | 0.623              | 0.665             | NA                |
|                            |         |                     | 1 | 0.048              | 0.043              | 0.022              | 0.024             | NA                |
|                            |         |                     | 2 | 0.091              | 0.081              | 0.068              | 0.028             | NA                |

Continued on next page

Table S2 – continued from previous page

| Metabolite            | RI      | Ions (M0)       | M | 21% O <sub>2</sub> | 15% O <sub>2</sub> | 10% O <sub>2</sub> | 5% O <sub>2</sub> | 1% O <sub>2</sub> |
|-----------------------|---------|-----------------|---|--------------------|--------------------|--------------------|-------------------|-------------------|
| RI 1823               | 1823.07 | 0 404 0 0 0     | 3 | 0.061              | 0.060              | 0.076              | 0.072             | NA                |
|                       |         |                 | 4 | 0.150              | 0.133              | 0.134              | 0.077             | NA                |
|                       |         |                 | 5 | 0.042              | 0.048              | 0.092              | 0.163             | NA                |
|                       |         |                 | 0 | NA                 | 0.928              | NA                 | NA                | NA                |
|                       |         |                 | 1 | NA                 | 0.035              | NA                 | NA                | NA                |
| RI 1920               | 1920.26 | 0 0 362 0 0     | 2 | NA                 | 0.035              | NA                 | NA                | NA                |
|                       |         |                 | 0 | NA                 | NA                 | 0.593              | NA                | NA                |
|                       |         |                 | 1 | NA                 | NA                 | 0.022              | NA                | NA                |
|                       |         |                 | 2 | NA                 | NA                 | 0.094              | NA                | NA                |
| Pantothenic acid 3TMS | 1983.3  | 0 0 0 291 0     | 3 | NA                 | NA                 | 0.017              | NA                | NA                |
|                       |         |                 | 4 | NA                 | NA                 | 0.313              | NA                | NA                |
|                       |         |                 | 0 | NA                 | NA                 | NA                 | 0.941             | NA                |
|                       |         |                 | 1 | NA                 | NA                 | NA                 | 0.000             | NA                |
| RI 2024               | 2023.57 | 346 0 0 0 0     | 2 | NA                 | NA                 | NA                 | 0.078             | NA                |
|                       |         |                 | 0 | 0.535              | NA                 | NA                 | NA                | NA                |
|                       |         |                 | 1 | 0.032              | NA                 | NA                 | NA                | NA                |
|                       |         |                 | 2 | 0.105              | NA                 | NA                 | NA                | NA                |
|                       |         |                 | 3 | 0.032              | NA                 | NA                 | NA                | NA                |
|                       |         |                 | 4 | 0.264              | NA                 | NA                 | NA                | NA                |
| RI 2075               | 2075.48 | 0 132 0 132 0   | 5 | -0.002             | NA                 | NA                 | NA                | NA                |
|                       |         |                 | 6 | 0.031              | NA                 | NA                 | NA                | NA                |
|                       |         |                 | 0 | NA                 | 0.916              | NA                 | 0.878             | NA                |
|                       |         |                 | 1 | NA                 | 0.047              | NA                 | 0.059             | NA                |
|                       |         |                 | 2 | NA                 | 0.012              | NA                 | 0.071             | NA                |
|                       |         |                 | 3 | NA                 | 0.036              | NA                 | NA                | NA                |
| RI 2158               | 2157.57 | 282 282 282 0 0 | 0 | 0.618              | 0.625              | 0.609              | NA                | NA                |
|                       |         |                 | 1 | 0.025              | 0.022              | 0.013              | NA                | NA                |
|                       |         |                 | 2 | 0.088              | 0.081              | 0.071              | NA                | NA                |

Continued on next page

Table S2 – continued from previous page

| Metabolite             | RI      | Ions (M0)         | M | 21% O <sub>2</sub> | 15% O <sub>2</sub> | 10% O <sub>2</sub> | 5% O <sub>2</sub> | 1% O <sub>2</sub> |
|------------------------|---------|-------------------|---|--------------------|--------------------|--------------------|-------------------|-------------------|
| Octadecanoic acid 1TMS | 2239.24 | 0 341 0 0 0       | 3 | 0.011              | 0.010              | 0.011              | NA                | NA                |
|                        |         |                   | 4 | 0.273              | 0.264              | 0.291              | NA                | NA                |
|                        |         |                   | 0 | NA                 | 0.883              | NA                 | NA                | NA                |
|                        |         |                   | 1 | NA                 | -0.006             | NA                 | NA                | NA                |
|                        |         |                   | 2 | NA                 | 0.048              | NA                 | NA                | NA                |
|                        |         |                   | 3 | NA                 | 0.031              | NA                 | NA                | NA                |
|                        |         |                   | 4 | NA                 | 0.040              | NA                 | NA                | NA                |
|                        |         |                   | 5 | NA                 | 0.011              | NA                 | NA                | NA                |
| RI 2473                | 2472.66 | 0 0 0 287 0       | 0 | NA                 | NA                 | NA                 | 0.517             | NA                |
|                        |         |                   | 1 | NA                 | NA                 | NA                 | 0.020             | NA                |
|                        |         |                   | 2 | NA                 | NA                 | NA                 | 0.022             | NA                |
|                        |         |                   | 3 | NA                 | NA                 | NA                 | 0.012             | NA                |
|                        |         |                   | 4 | NA                 | NA                 | NA                 | 0.020             | NA                |
|                        |         |                   | 5 | NA                 | NA                 | NA                 | 0.395             | NA                |
|                        |         |                   | 6 | NA                 | NA                 | NA                 | 0.007             | NA                |
|                        |         |                   | 7 | NA                 | NA                 | NA                 | 0.000             | NA                |
| RI 2578                | 2578.32 | 363 363 363 363 0 | 8 | NA                 | NA                 | NA                 | 0.028             | NA                |
|                        |         |                   | 0 | 0.681              | 0.705              | 0.686              | 0.710             | NA                |
|                        |         |                   | 1 | 0.028              | 0.013              | -0.001             | 0.028             | NA                |
|                        |         |                   | 2 | 0.070              | 0.079              | 0.067              | 0.049             | NA                |
|                        |         |                   | 3 | 0.157              | 0.152              | 0.148              | 0.093             | NA                |
|                        |         |                   | 4 | 0.015              | 0.007              | 0.012              | 0.021             | NA                |
|                        |         |                   | 5 | 0.061              | 0.062              | 0.116              | 0.124             | NA                |

**Table S3:** Metabolites, derivatives and ions in Figure 3 (MID variation).

| <b>[1,2-<sup>13</sup>C<sub>2</sub>]glucose</b> |                                    |                          |
|------------------------------------------------|------------------------------------|--------------------------|
| <b>Metabolite</b>                              | <b>Derivative</b>                  | <b>M<sub>0</sub> m/z</b> |
| Malate                                         | Malic acid 3TMS                    | 335                      |
| <i>N</i> -acetylaspartic acid                  | <i>N</i> -acetylaspartic acid 2TMS | 245                      |
| Citrate                                        | Citric acid 4TMS                   | 375                      |
| <i>Unidentified</i>                            | RI 2578                            | 363                      |
| AMP                                            | 5TMS                               | 169                      |

| <b>[U-<sup>13</sup>C]glutamine</b> |                                    |                          |
|------------------------------------|------------------------------------|--------------------------|
| <b>Metabolite</b>                  | <b>Derivative</b>                  | <b>M<sub>0</sub> m/z</b> |
| Citrate                            | Citric acid 4TMS                   | 375                      |
| Malate                             | Malic acid 3TMS                    | 245                      |
| Glutamate                          | Glutamic acid 2TMS                 | 276                      |
| Glutamate (not shown)              | Glutamic acid 3TMS                 | 348                      |
| <i>N</i> -acetylaspartic acid      | <i>N</i> -acetylaspartic acid 2TMS | 245                      |

**Table S4:** Metabolites, derivatives and ions in Figure 4 (MID similarity).

| <b><i>N</i>-acetylaspartic acid ([U-<sup>13</sup>C]glutamine)</b> |                                    |                          |
|-------------------------------------------------------------------|------------------------------------|--------------------------|
| <b>Metabolite</b>                                                 | <b>Derivative</b>                  | <b>M<sub>0</sub> m/z</b> |
| Malate                                                            | Malic acid 3TMS                    | 335                      |
| Aspartate                                                         | Aspartic acid 3TMS                 | 334                      |
| <i>N</i> -acetylaspartic acid                                     | <i>N</i> -acetylaspartic acid 2TMS | 304                      |
| Proline                                                           | Proline 1TMS                       | 172                      |

| <b><i>N</i>-acetylaspartic acid ([1,2-<sup>13</sup>C<sub>2</sub>]glucose)</b> |                                    |                          |
|-------------------------------------------------------------------------------|------------------------------------|--------------------------|
| <b>Metabolite</b>                                                             | <b>Derivative</b>                  | <b>M<sub>0</sub> m/z</b> |
| <i>N</i> -acetylaspartic acid                                                 | <i>N</i> -acetylaspartic acid 2TMS | 245                      |
| Citrate                                                                       | Citric acid 4TMS                   | 375                      |
| Alanine                                                                       | Alanine 2TMS                       | 218                      |

| <b>RI 2578 ([U-<sup>13</sup>C]glutamine)</b> |                   |                          |
|----------------------------------------------|-------------------|--------------------------|
| <b>Metabolite</b>                            | <b>Derivative</b> | <b>M<sub>0</sub> m/z</b> |
| RI 2578                                      | ?                 | 363                      |
| Citrate                                      | Citric acid 4TMS  | 375                      |

| <b>RI 2578 ([1,2-<sup>13</sup>C<sub>2</sub>]glucose)</b> |                        |                          |
|----------------------------------------------------------|------------------------|--------------------------|
| <b>Metabolite</b>                                        | <b>Derivative</b>      | <b>M<sub>0</sub> m/z</b> |
| RI 2578                                                  | ?                      | 363                      |
| Glycerol-3-phosphate                                     | G3P 4TMS               | 357                      |
| Pyroglutamate                                            | Pyroglutamic acid 2TMS | 214                      |



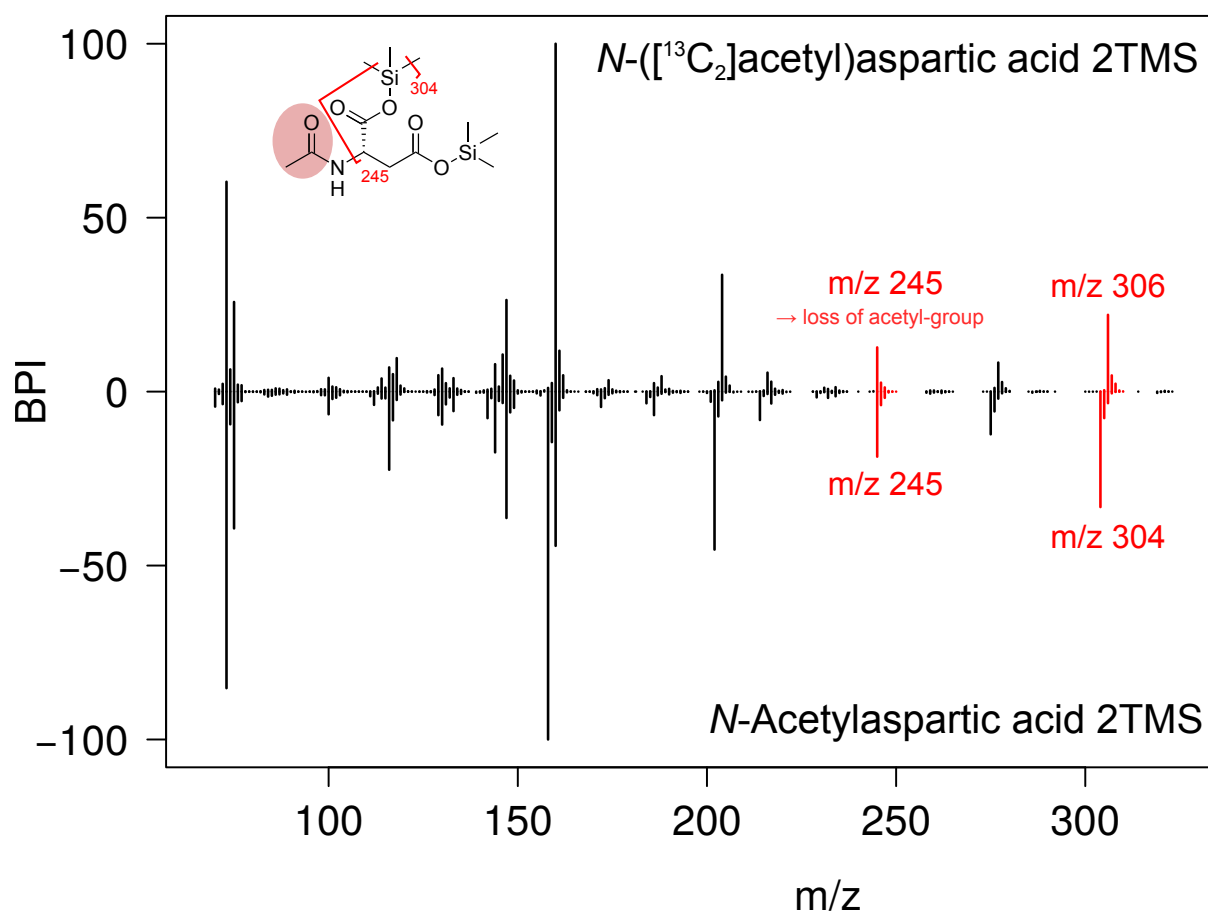

**Figure S5:** EI-MS spectrum of labeled and unlabeled *N*-acetylaspartic acid 2TMS confirming the loss of the acetyl-group in fragment  $m/z$  245.

**Table S6:** siRNA target sequences for gene silencing as part of ON-TARGETplus smart pools (Dharmacon/GEHealthcare).

| Gene symbol          | Target sequence           |
|----------------------|---------------------------|
| <i>non-targeting</i> | 5'-UGGUUUACAUGUCGACUAA-3' |
|                      | 5'-UGGUUUACAUGUUGUGUGA-3' |
|                      | 5'-UGGUUUACAUGUUUUCUGA-3' |
|                      | 5'-UGGUUUACAUGUUUUCUA-3'  |
| NAT8L                | 5'-CUUAAUUCUUGGGACAAA-3'  |
|                      | 5'-CGGACAUCGAGCAGUACUA-3' |
|                      | 5'-GUUUGUACCCUAAGACACA-3' |
|                      | 5'-AGUUCGCCGUGGUGCACAA-3' |

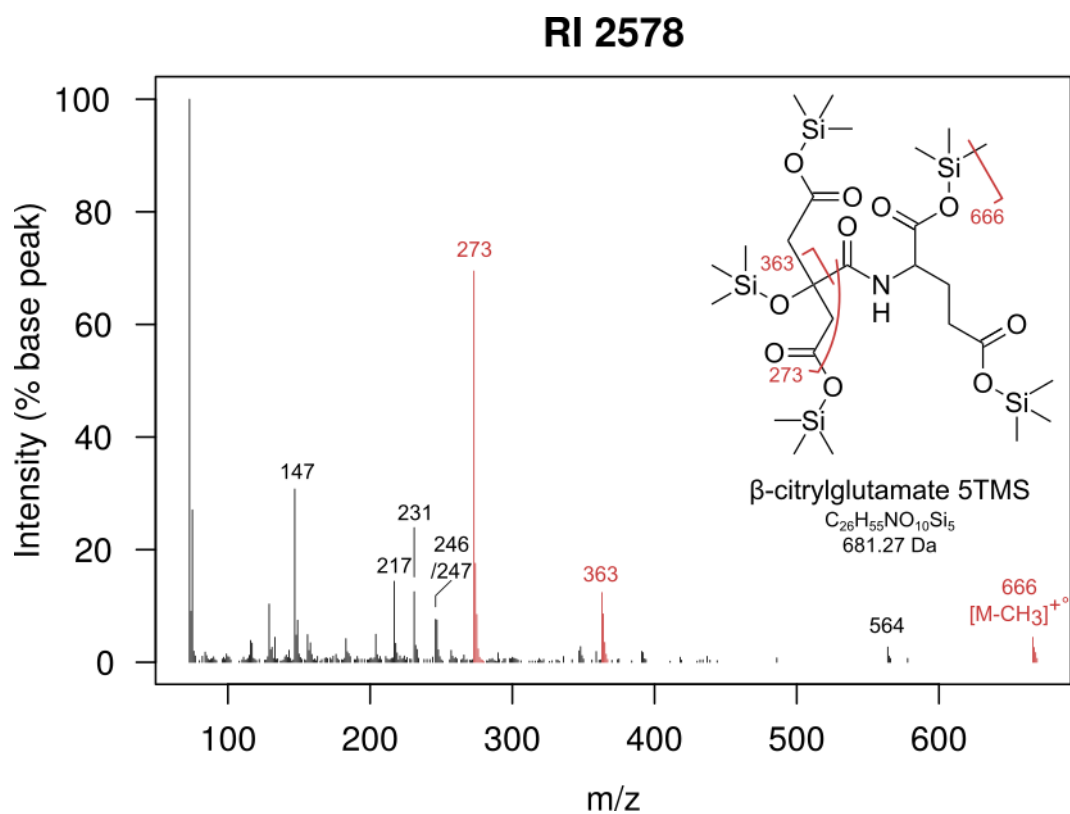

**Figure S7:** EI-MS spectrum with putative structure of  $\beta$ -citrylglutamate 5TMS and fragmentation of RI 2578.
